# Supplementary material
Source: PubMed Central journal article supplement (PMC6400429)
Supplement: nn6b07692_si_001.pdf [file nn6b07692_si_001.pdf]

## Supplementary Electronic Information

### Directional Charge Carriers Transport in Oriented Benzodithiophene Covalent Organic Framework Thin Films

Dana D. Medina,<sup>†,\*a</sup> Michiel L. Petrus,<sup>†,a</sup> Askhat N. Jumabekov,<sup>†,c</sup> Johannes T. Margraf,<sup>b,d</sup>  
Simon Weinberger,<sup>a</sup> Julian M. Rotter,<sup>a</sup> Timothy Clark<sup>b</sup> and Thomas Bein<sup>\*,a</sup>

<sup>a</sup> Department of Chemistry and Center for NanoScience (CeNS), University of Munich (LMU), Butenandtstr. 5-13, 81377 Munich, Germany

<sup>b</sup> Friedrich-Alexander-University Erlangen-Nürnberg (FAU), Computer-Chemie-Centrum, Nögelsbachstraße 25, 91052 Erlangen, Germany

<sup>c</sup> CSIRO Manufacturing, Clayton, Victoria 3168, Australia

<sup>d</sup> Quantum Theory Project, University of Florida, Gainesville, Florida 32611, USA

|                                                                   |               |
|-------------------------------------------------------------------|---------------|
| <b>Section 1. X-ray diffraction and SEM of BDT-COF thin films</b> | <b>p. 2</b>   |
| <b>Section 2. UV-vis and Tauc plots</b>                           | <b>p. 3-5</b> |
| <b>Section 3. Cross section SEM of HODs</b>                       | <b>p. 6</b>   |
| <b>Section 4. Mobility data</b>                                   | <b>p. 7-8</b> |
| <b>Section 5. In-plane conductivity measurements</b>              | <b>p. 9</b>   |
| <b>Section 6. MD simulations</b>                                  | <b>p. 10</b>  |

## Section 1. X-ray diffraction of thin BDT-COF film

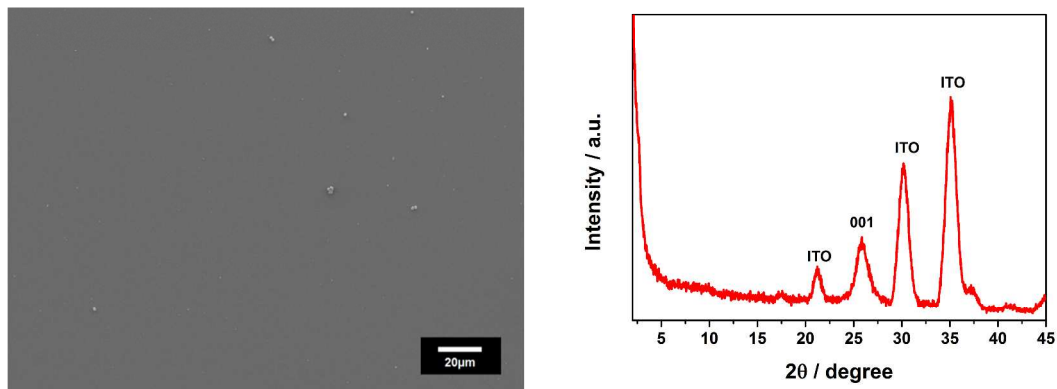

Figure S1. Left) Top view SEM image of BDT-COF thin film grown on ITO. right) XRD pattern of BDT-COF thin film on ITO. The strong and sharp reflection at  $26.1^\circ$   $2\theta$  is related to the stacked 2D COF layers, all other reflections are attributed to the ITO film.

## Section 2. UV-vis and Tauc plots

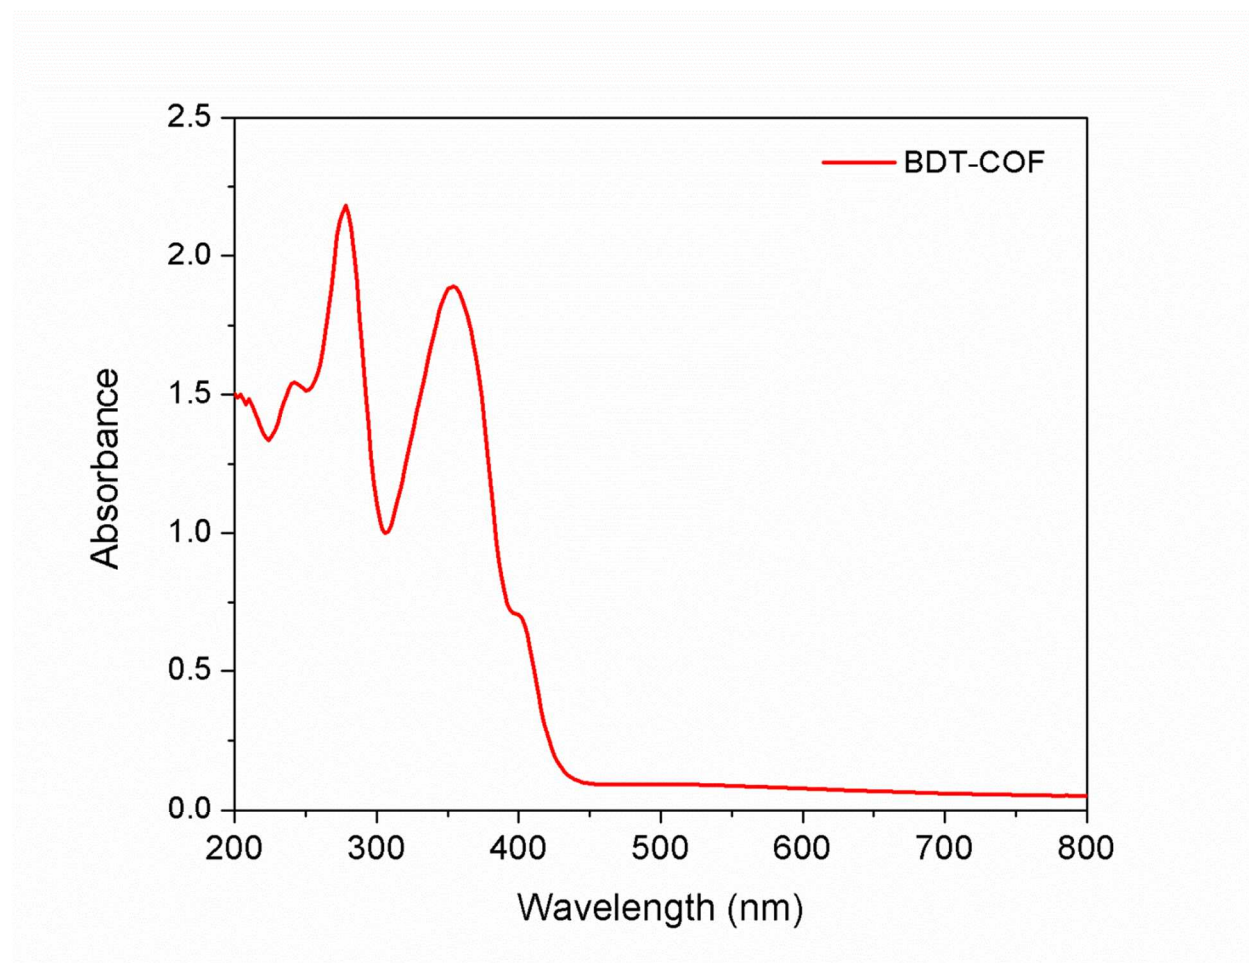

Figure S2. UV-Vis spectra of BDT-COF on a quartz substrate.

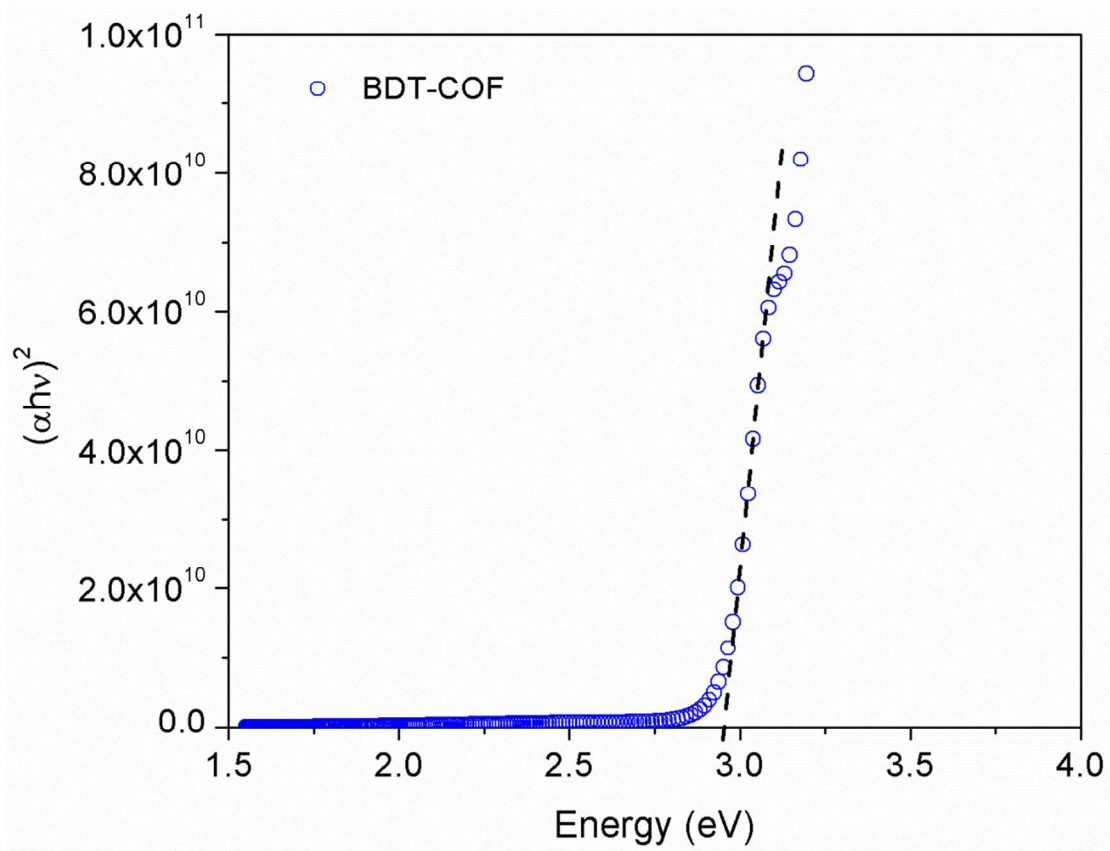

Figure S3. Tauc plot of BDT-COF grown on a quartz substrate.

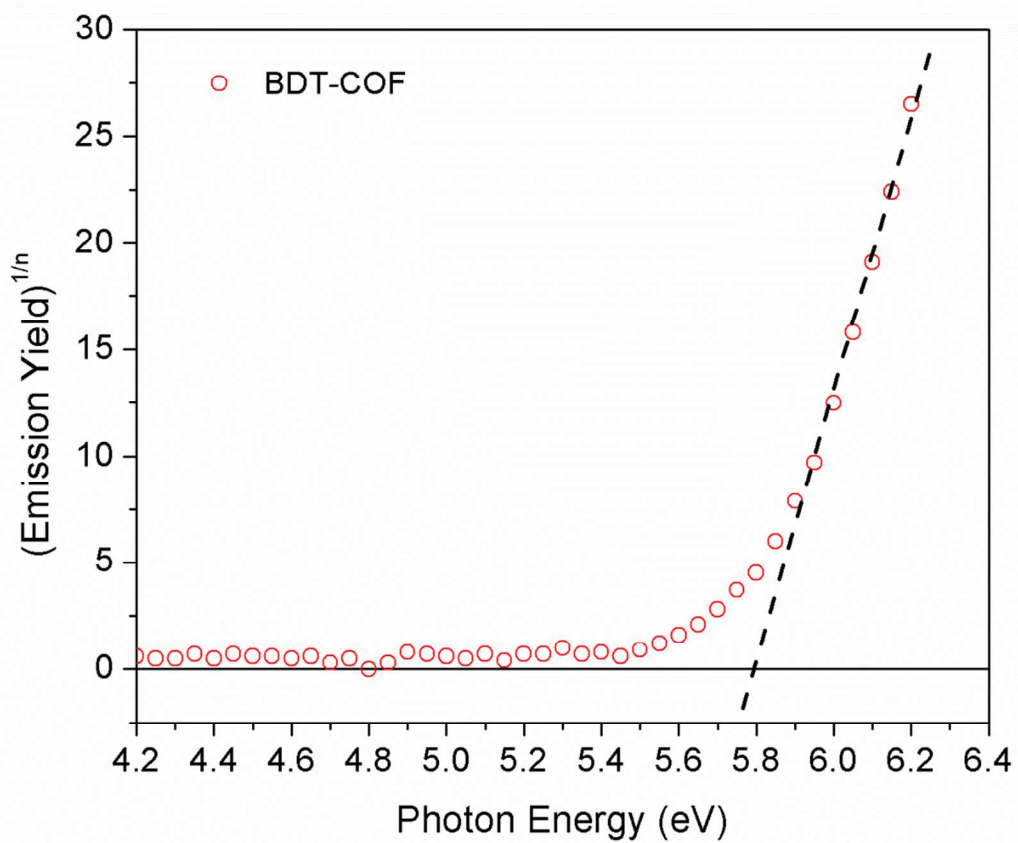

Figure S4. PESA spectra of BDT-COF grown on a quartz substrate.

### Section 3. Cross-section SEM of HODs

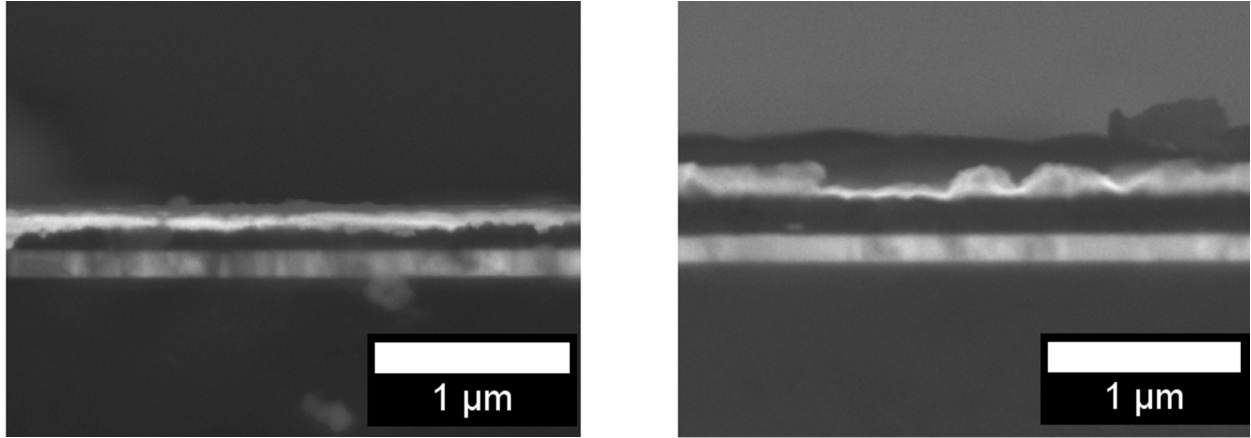

Figure S5. Cross section SEMs of HODs with different thickness: left) 120 nm, right) 150 nm  
(Evident layers layout of the HODs: ITO/COF/gold)

## Section 4: Mobility data

Table S1. Calculated hole mobility for 80-100 nm thick sample in the dark

| Device         | $\mu_h$ (cm <sup>2</sup> V <sup>-1</sup> s <sup>-1</sup> ) |
|----------------|------------------------------------------------------------|
| 1              | $5.3 \cdot 10^{-7}$                                        |
| 2              | $4.4 \cdot 10^{-7}$                                        |
| 3              | $1.2 \cdot 10^{-7}$                                        |
| 4              | $1.3 \cdot 10^{-7}$                                        |
| <b>Average</b> | $3 \cdot 10^{-7}$                                          |

Table S2. Calculated hole mobility for 120-150 nm thick sample in the dark

| Device         | $\mu_h$ (cm <sup>2</sup> V <sup>-1</sup> s <sup>-1</sup> ) |
|----------------|------------------------------------------------------------|
| 1              | $1.0 \cdot 10^{-8}$                                        |
| 2              | $1.2 \cdot 10^{-8}$                                        |
| <b>Average</b> | $1 \cdot 10^{-8}$                                          |

Table S3. Calculated hole mobility for 190-210 nm thick sample in the dark

| Device         | $\mu_h$ (cm <sup>2</sup> V <sup>-1</sup> s <sup>-1</sup> ) |
|----------------|------------------------------------------------------------|
| 1              | $5.9 \cdot 10^{-9}$                                        |
| 2              | $4.7 \cdot 10^{-9}$                                        |
| 3              | $5.1 \cdot 10^{-9}$                                        |
| <b>Average</b> | $5 \cdot 10^{-9}$                                          |

Table S4. Calculated hole mobility for 190-210 nm thick sample in the light

| Device         | $\mu_h$ (cm <sup>2</sup> V <sup>-1</sup> s <sup>-1</sup> ) |
|----------------|------------------------------------------------------------|
| 1              | $5.8 \cdot 10^{-8}$                                        |
| 2              | $1.5 \cdot 10^{-8}$                                        |
| 3              | $1.7 \cdot 10^{-8}$                                        |
| <b>Average</b> | $3 \cdot 10^{-8}$                                          |

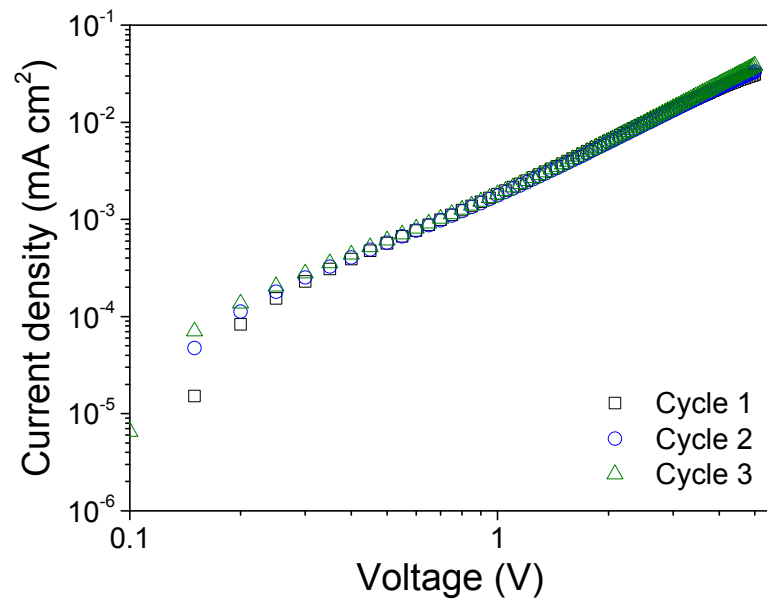

Figure S6. Current density as a function of voltage ( $J$ - $V$ ) of a single hole-only device containing BDT-COF layers measured three consecutive times under ambient conditions.



## Section 5. In-plane Conductivity

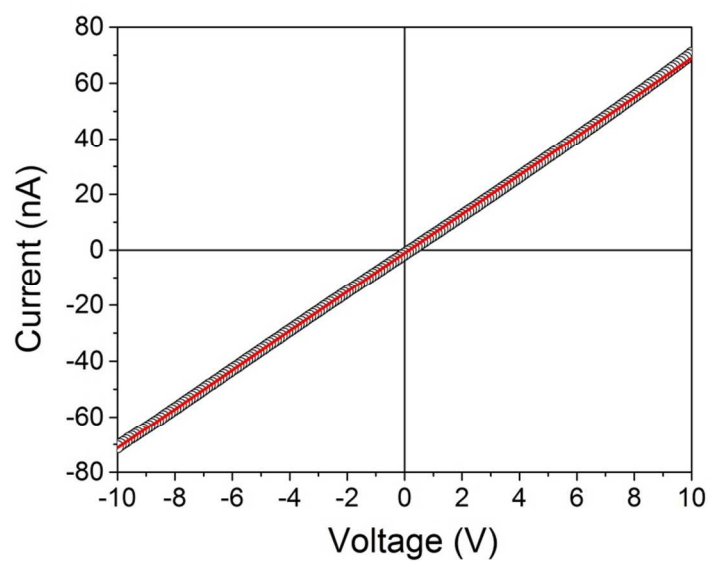

Figure S7. Photocurrent obtained for oriented BDT-COF films on interdigitated Au electrodes as a function of applied voltage. The red line shows a linear fit through the data points.

## Section 6. MD simulations

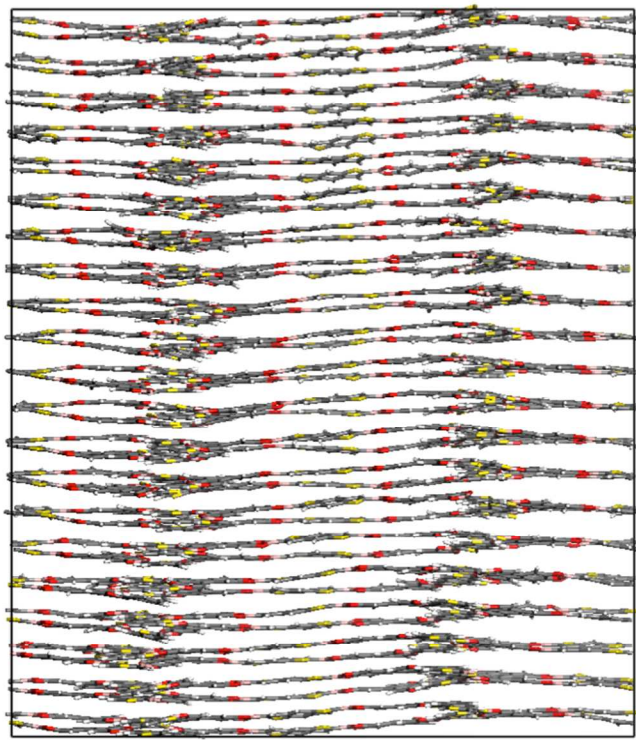

Figure S8. Side view of equilibrated BDT-COF unit cell after a 1 ns MD run, showing the slight waviness of individual layers.
